# Supplementary material for: Severity and Longitudinal Course of Depression, Anxiety and Post-Traumatic Stress in Paediatric and Young Adult Cancer Patients: A Systematic Review and Meta-Analysis
Source: MDPI journal article supplement (doi:10.3390/jcm12051784), 2023-02-23
Supplement: s1 [file s1]

Supplementary Materials

# Severity and Longitudinal Course of Depression, Anxiety and Post-Traumatic Stress in Paediatric and Young Adult Cancer Patients: A Systematic Review and Meta-Analysis

Ainsley Ryan Yan Bin Lee <sup>1</sup>, Chun En Yau <sup>1</sup>, Chen Ee Low <sup>1</sup>, Jiaqi Li <sup>2</sup>, Roger C. M. Ho <sup>3,4</sup>  
and Cyrus Su Hui Ho <sup>3,4,\*</sup>

<sup>1</sup> Yong Loo Lin School of Medicine, National University of Singapore, Singapore 119228, Singapore

<sup>2</sup> School of Clinical Medicine, University of Cambridge, Cambridge CB2 1TN, UK

<sup>3</sup> Department of Psychological Medicine, Yong Loo Lin School of Medicine, National University of Singapore, Singapore 119228, Singapore

<sup>4</sup> Department of Psychological Medicine, National University Hospital, Singapore 119228, Singapore

\* Correspondence: pcmhsh@nus.edu.sg

**Table S1:** Search strategy

## EMBASE

|    |                                                                                                                     |
|----|---------------------------------------------------------------------------------------------------------------------|
| #1 | (Pediatric* OR paediatric* OR juvenile* OR "young adult*" OR 'childhood'):ti,ab                                     |
| #2 | "neoplasm"/exp or ('neoplasm' OR 'cancer*' OR 'tumo*' OR 'malign*' OR 'leukemia*' OR 'lymphoma*'):ti,ab             |
| #3 | ('depression' OR 'depressive' OR 'anxiety' OR 'anxiety disorder' OR 'post-trauma*' OR 'post trauma*' or 'PTSD')/exp |

#1 and #2 and #3 and NOT [medline]/lim

## PubMed

|    |                                                                                                                                                                                                                                                                            |
|----|----------------------------------------------------------------------------------------------------------------------------------------------------------------------------------------------------------------------------------------------------------------------------|
| #1 | ("Pediatric"[Title/Abstract] OR "paediatric"[Title/Abstract] OR "Young Adult"[Title/Abstract] OR "Child"[Title/Abstract] OR juvenile*[Title/Abstract] OR infant*[Title/Abstract] OR adolesc*[Title/Abstract])                                                              |
| #2 | (neoplas*[Title/Abstract] OR cancer*[Title/Abstract] OR tumor*[Title/Abstract] OR malign*[Title/Abstract] OR leukemia*[Title/Abstract] OR lymphoma*[Title/Abstract])                                                                                                       |
| #3 | ("Anxiety"[Mesh] OR "Anxiety Disorders"[Mesh] OR "Post-Traumatic"[Title/Abstract] OR "PTSD"[Title/Abstract] OR "posttraumatic"[Title/Abstract] OR "Post Traumatic"[Title/Abstract] OR "Depress*[Title/Abstract] OR "Depressive"[Title/Abstract] OR "Anxi*[Title/Abstract]) |

#1 and #2 and #3

**Table S2:** Risk, protective and exacerbating factors of psychological symptoms in PYACPs.

| Study | Duration of study | Cancer and treatment-related factors | Family and environmental factors | Patient factors | Social and economic factors |
|-------|-------------------|--------------------------------------|----------------------------------|-----------------|-----------------------------|
|-------|-------------------|--------------------------------------|----------------------------------|-----------------|-----------------------------|

| Depression                  |                                                                                |                                                                                                                                                                                                           |                                                                                                                                                                                                                                                 |                                                                                                                                                                                   |                                                                                   |
|-----------------------------|--------------------------------------------------------------------------------|-----------------------------------------------------------------------------------------------------------------------------------------------------------------------------------------------------------|-------------------------------------------------------------------------------------------------------------------------------------------------------------------------------------------------------------------------------------------------|-----------------------------------------------------------------------------------------------------------------------------------------------------------------------------------|-----------------------------------------------------------------------------------|
| Kunin-Batson et al. [26]    | Up to 12 months after diagnosis, and 3 months after completion of chemotherapy | *Having a neurological event on therapy had a significantly higher depression than those without (OR=2.99; p=0.042)                                                                                       | *Family function: ‘Unhealthy functioning’: Significantly higher depression than ‘healthy functioning’ (OR=2.62; p=0.024)<br><br>Marital status of parents: ‘Unmarried’ had insignificantly lower anxiety than ‘married’                         | Age at diagnosis: ‘School age (5-9 years)’ had insignificantly lower depression than ‘preschool (2-4 years)’<br><br>Sex: Males had insignificantly lower depression than females  | Annual family income: <\$50000 had insignificantly lower depression than >\$50000 |
| Myers et al. [27]           | Up to 12 months after diagnosis                                                | No relevant mediators studied and reported                                                                                                                                                                | *Family function: ‘Unhealthy functioning’: Significantly higher depression than ‘healthy functioning’ (OR=2.40; p=0.008)<br><br>*Marital status of parents: ‘Not married’ had significantly higher depression than ‘married’ (OR=2.36; p=0.017) | Age at diagnosis: ‘School age (5-12 years)’ had insignificantly lower depression than ‘preschool (2-4 years)’<br><br>Sex: Males had insignificantly lower depression than females | No relevant mediators studied and reported                                        |
| Sargin Yildirim et al. [28] | During treatment and post-treatment                                            | *During treatment: Patients with central nervous system tumours had significantly higher depression than other cancers (p=0.025)<br><br>Post-treatment: Type of cancer had no association with depression | No relevant mediators studied and reported                                                                                                                                                                                                      | No relevant mediators studied and reported                                                                                                                                        | No relevant mediators studied and reported                                        |
| Yardeni et al. [31]         | Up to 12 months after diagnosis                                                | Type of cancer: No association with depression<br><br>Currently receiving acute phase treatment: No association with depression                                                                           | No relevant mediators studied and reported                                                                                                                                                                                                      | *Experiencing concomitant anxiety: Significantly higher depression (b=2.04; p=0.014)                                                                                              | No relevant mediators studied and reported                                        |
| Desjardins et al. [33]      | Up to 8 months after diagnosis                                                 | *Having low grade gliomas: Significantly higher depression than other cancers<br><br>Receiving cranial radiation therapy: Insignificant association with depression                                       | No relevant mediators studied and reported                                                                                                                                                                                                      | *Female sex: Significantly higher depression than male sex<br><br>Age at diagnosis: Insignificant association with depression                                                     | No relevant mediators studied and reported                                        |
| Anxiety                     |                                                                                |                                                                                                                                                                                                           |                                                                                                                                                                                                                                                 |                                                                                                                                                                                   |                                                                                   |
| Kunin-Batson et al. [26]    | Up to 12 months after diagnosis, and 3 months after completion of chemotherapy | Having a neurological event on therapy had an insignificantly lower OR than those without                                                                                                                 | Family function: ‘Unhealthy functioning’ had insignificantly higher OR than ‘healthy functioning’<br><br>Marital status of parents: ‘Unmarried’ had insignificantly lower anxiety than ‘married’                                                | Age at diagnosis: ‘School age (5-9 years)’ had insignificantly lower OR than ‘preschool (2-4 years)’<br><br>Sex: Males had insignificantly higher OR than females                 | Annual family income: <\$50000 had insignificantly lower OR than >\$50000         |

|                                |                                                                       |                                                                                                                                                                                                                                                                                                                                  |                                                                                                                                                                                                                  |                                                                                                                                                                                                                                                                                                             |                                            |
|--------------------------------|-----------------------------------------------------------------------|----------------------------------------------------------------------------------------------------------------------------------------------------------------------------------------------------------------------------------------------------------------------------------------------------------------------------------|------------------------------------------------------------------------------------------------------------------------------------------------------------------------------------------------------------------|-------------------------------------------------------------------------------------------------------------------------------------------------------------------------------------------------------------------------------------------------------------------------------------------------------------|--------------------------------------------|
| Myers et al. [27]              | Up to 12 months after diagnosis                                       | No relevant mediators studied and reported                                                                                                                                                                                                                                                                                       | <p>*Family function: ‘Unhealthy functioning’: Significantly higher anxiety than ‘healthy functioning’ (OR=2.24, p=0.033)</p> <p>*Marriage status: ‘Not married’: Significantly higher anxiety than ‘married’</p> | <p>Age at diagnosis: ‘School age (5-12 years)’ had insignificantly lower OR than ‘preschool (2-4 years)’</p> <p>Sex: Males had insignificantly lower OR than females</p>                                                                                                                                    | No relevant mediators studied and reported |
| Yardeni et al. [31]            | Up to 12 months after diagnosis                                       | <p>*Having a brain tumour: Significantly higher anxiety than other cancers (b=7.35; p=0.027)</p> <p>*Currently receiving acute phase treatment: Significantly higher anxiety (b=2.98; 0.014)</p>                                                                                                                                 | No relevant mediators studied and reported                                                                                                                                                                       | *Experiencing concomitant depression: Significantly higher anxiety (b=2.04; p=0.014)                                                                                                                                                                                                                        | No relevant mediators studied and reported |
| Desjardins et al. [33]         | Up to 8 months after diagnosis                                        | <p>*Having low grade gliomas: Significantly higher anxiety than other cancers</p> <p>Receiving cranial radiation therapy: Insignificant association with anxiety</p>                                                                                                                                                             | No relevant mediators studied and reported                                                                                                                                                                       | <p>*Female sex: Significantly higher anxiety than male sex</p> <p>Age at diagnosis: Insignificant association with anxiety</p>                                                                                                                                                                              | No relevant mediators studied and reported |
| Post-traumatic stress symptoms |                                                                       |                                                                                                                                                                                                                                                                                                                                  |                                                                                                                                                                                                                  |                                                                                                                                                                                                                                                                                                             |                                            |
| Werk et al. [32]               | 6.7 months after diagnosis and 12.4 months after the first assessment | <p>Stage of cancer: Higher stage had insignificantly higher PTSS</p> <p>*Experiencing relapse of cancer: Significantly higher PTSS (OR=2.18; p&lt;0.01)</p> <p>*Experiencing fatigue symptoms: Significantly higher OR (p&lt;0.01)</p> <p>*Experiencing activity limitations: Significantly higher PTSS (OR=1.05; p&lt;0.01)</p> | No relevant mediators studied and reported                                                                                                                                                                       | <p>*Having concerns about the future: Significantly higher PTSS (OR=1.13; p&lt;0.01)</p> <p>Sex: Males had insignificantly lower PTSS than females</p> <p>Age at diagnosis: Older age had insignificantly higher PTSS</p> <p>*Previously reporting PTSS: Significantly higher PTSS (OR=1.19; p&lt;0.01)</p> | No relevant mediators studied and reported |

|                  |                                 |                                                                                                                                                                                                                                                                                                                                                                                                                                                                                   |                                            |                                                                                                                                                                  |                                                                                              |
|------------------|---------------------------------|-----------------------------------------------------------------------------------------------------------------------------------------------------------------------------------------------------------------------------------------------------------------------------------------------------------------------------------------------------------------------------------------------------------------------------------------------------------------------------------|--------------------------------------------|------------------------------------------------------------------------------------------------------------------------------------------------------------------|----------------------------------------------------------------------------------------------|
| Kwak et al. [35] | Up to 12 months after diagnosis | <p>*Poorer prognosis of cancer: Significantly higher PTSS (<math>p &lt; 0.001</math>)</p> <p>*Receiving active treatment at time of assessment: Significantly higher PTSS (<math>p &lt; 0.01</math>)</p> <p>*Amongst patients receiving surgery, those who received surgery for staging reasons: Significantly lower PTSS than for treatment reasons (<math>p &lt; 0.05</math>)</p> <p>*Experiencing more side effects: Significantly higher PTSS (<math>p &lt; 0.001</math>)</p> | No relevant mediators studied and reported | <p>Sex: Males had insignificantly higher PTSS than females</p> <p>*Previously having experienced PTSS: Significantly higher PTSS (<math>p &lt; 0.001</math>)</p> | *Experiencing disruption in employment / schooling: Significantly higher PTSS ( $p < 0.05$ ) |
|------------------|---------------------------------|-----------------------------------------------------------------------------------------------------------------------------------------------------------------------------------------------------------------------------------------------------------------------------------------------------------------------------------------------------------------------------------------------------------------------------------------------------------------------------------|--------------------------------------------|------------------------------------------------------------------------------------------------------------------------------------------------------------------|----------------------------------------------------------------------------------------------|

\*Indicates variable studied had a significant association with the outcome ( $p$ -value  $< 0.05$ ).

Abbreviations: Odds ratio, OR; CI, confidence interval; Post-traumatic stress symptoms, PTSS.

Footnotes: Prikken et al, Jorngarden et al, Larsson et al and Kaplan et al are not included in this table as no relevant outcome mediators were studied and reported.

**Table S3:** Quality assessment of included cohort studies using the Joanna Briggs Institute Critical Appraisal tool

| Study                       | 1  | 2 | 3 | 4 | 5 | 6  | 7 | 8 | 9 | 10 | 11 | Total |
|-----------------------------|----|---|---|---|---|----|---|---|---|----|----|-------|
| Kunin-Batson et al. [26]    | Y  | Y | Y | N | N | NA | Y | Y | Y | Y  | Y  | 8     |
| Myers et al. [27]           | Y  | Y | Y | Y | Y | NA | Y | Y | Y | Y  | Y  | 10    |
| Werk et al. [32]            | NA | Y | Y | Y | Y | NA | Y | Y | Y | Y  | Y  | 9     |
| Kaplan et al. [36]          | Y  | Y | Y | N | N | NA | Y | Y | Y | Y  | Y  | 8     |
| Desjardins et al. [33]      | Y  | Y | Y | N | N | NA | Y | Y | Y | Y  | Y  | 8     |
| Prikken et al. [34]         | Y  | Y | Y | N | N | NA | Y | Y | Y | Y  | Y  | 8     |
| Kwak et al. [35]            | NA | Y | Y | Y | Y | NA | Y | Y | Y | Y  | Y  | 9     |
| Gupta et al. [38]           | Y  | Y | Y | N | N | NA | Y | Y | Y | Y  | Y  | 8     |
| Monteiro et al. [37]        | Y  | Y | Y | N | N | NA | Y | Y | Y | Y  | Y  | 8     |
| Sargin Yildirim et al. [28] | Y  | Y | Y | Y | Y | NA | Y | Y | Y | Y  | Y  | 10    |
| Jorngarden et al. [29]      | Y  | Y | Y | N | N | NA | Y | Y | Y | Y  | Y  | 8     |
| Larsson et al. [30]         | Y  | Y | Y | Y | Y | NA | Y | Y | Y | Y  | Y  | 10    |
| Yardeni et al. [31]         | Y  | Y | Y | Y | U | NA | Y | Y | Y | Y  | Y  | 9     |

| Checklist                                                                                                     |
|---------------------------------------------------------------------------------------------------------------|
| 1. Were the two groups similar and recruited from the same population?                                        |
| 2. Were the exposures measured similarly to assign people to both exposed and unexposed groups?               |
| 3. Was the exposure measured in a valid and reliable way?                                                     |
| 4. Were confounding factors identified?                                                                       |
| 5. Were strategies to deal with confounding factors stated?                                                   |
| 6. Were the groups/participants free of the outcome at the start of the study (or at the moment of exposure)? |
| 7. Were the outcomes measured in a valid and reliable way?                                                    |
| 8. Was the follow up time reported and sufficient to be long enough for outcomes to occur?                    |

|                                                                                                      |
|------------------------------------------------------------------------------------------------------|
| 9. Was follow up complete, and if not, were the reasons to loss to follow up described and explored? |
| 10. Were strategies to address incomplete follow up utilized?                                        |
| 11. Was appropriate statistical analysis used?                                                       |

Legend:

Y – Yes

N – No

U – Unclear

NA – Not applicable

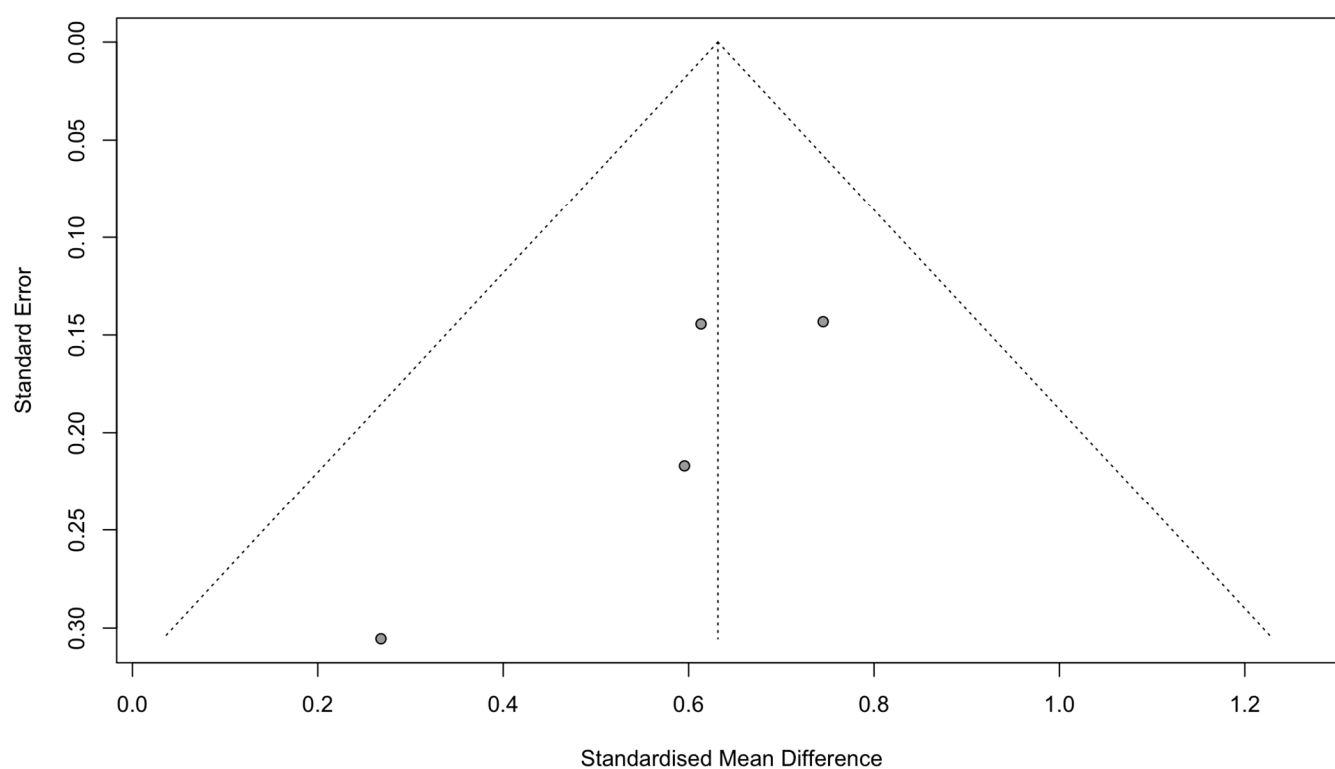

**Figure S1:** Funnel plot of baseline depressive symptoms.

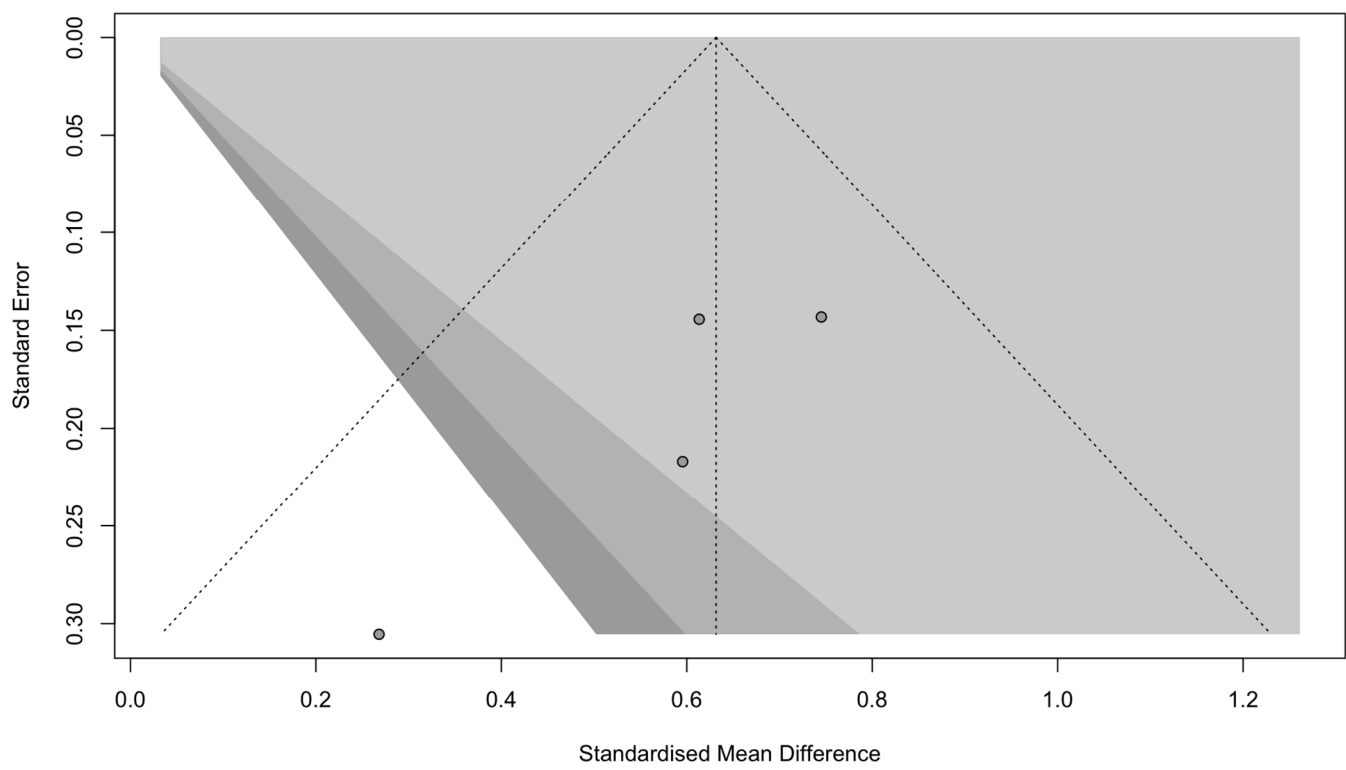

**Figure S2:** Trim-and-fill plot of baseline depressive symptoms.

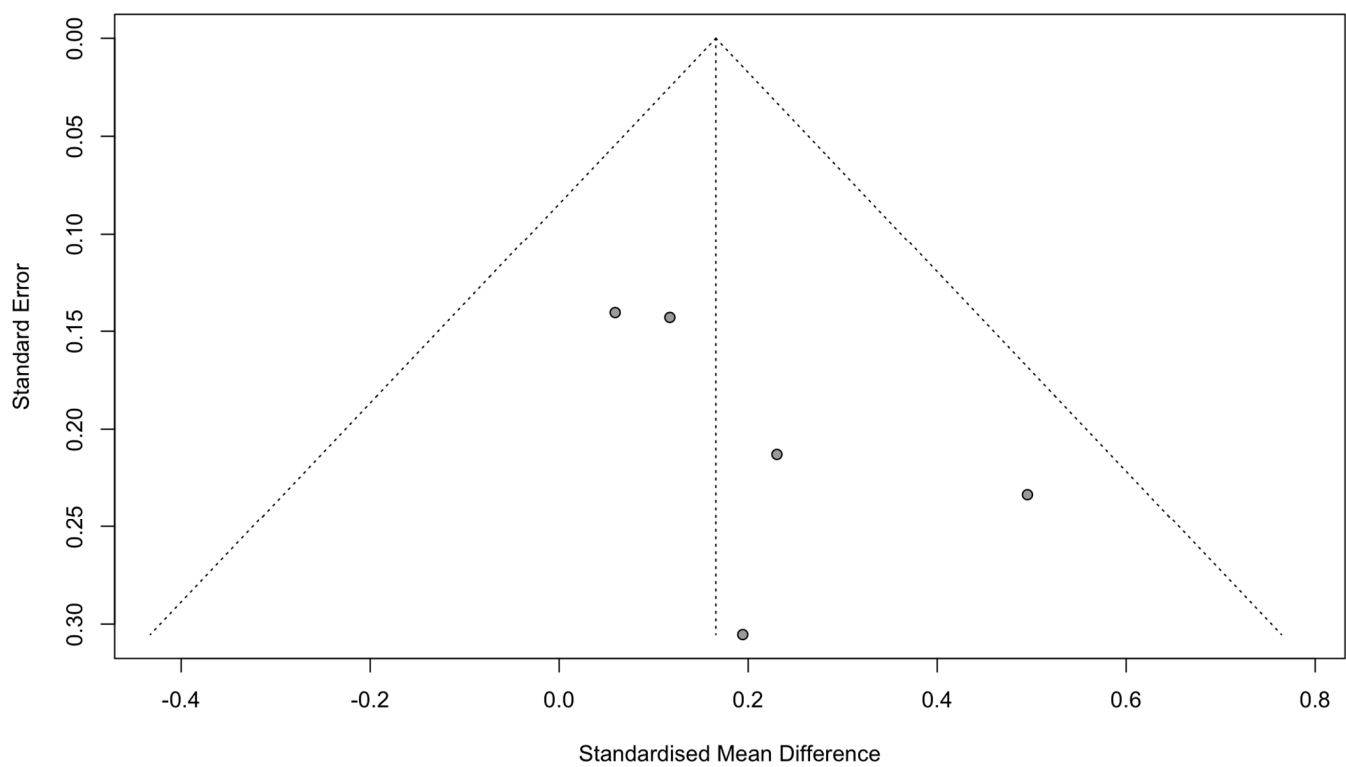

**Figure S3:** Funnel plot of baseline anxiety symptoms.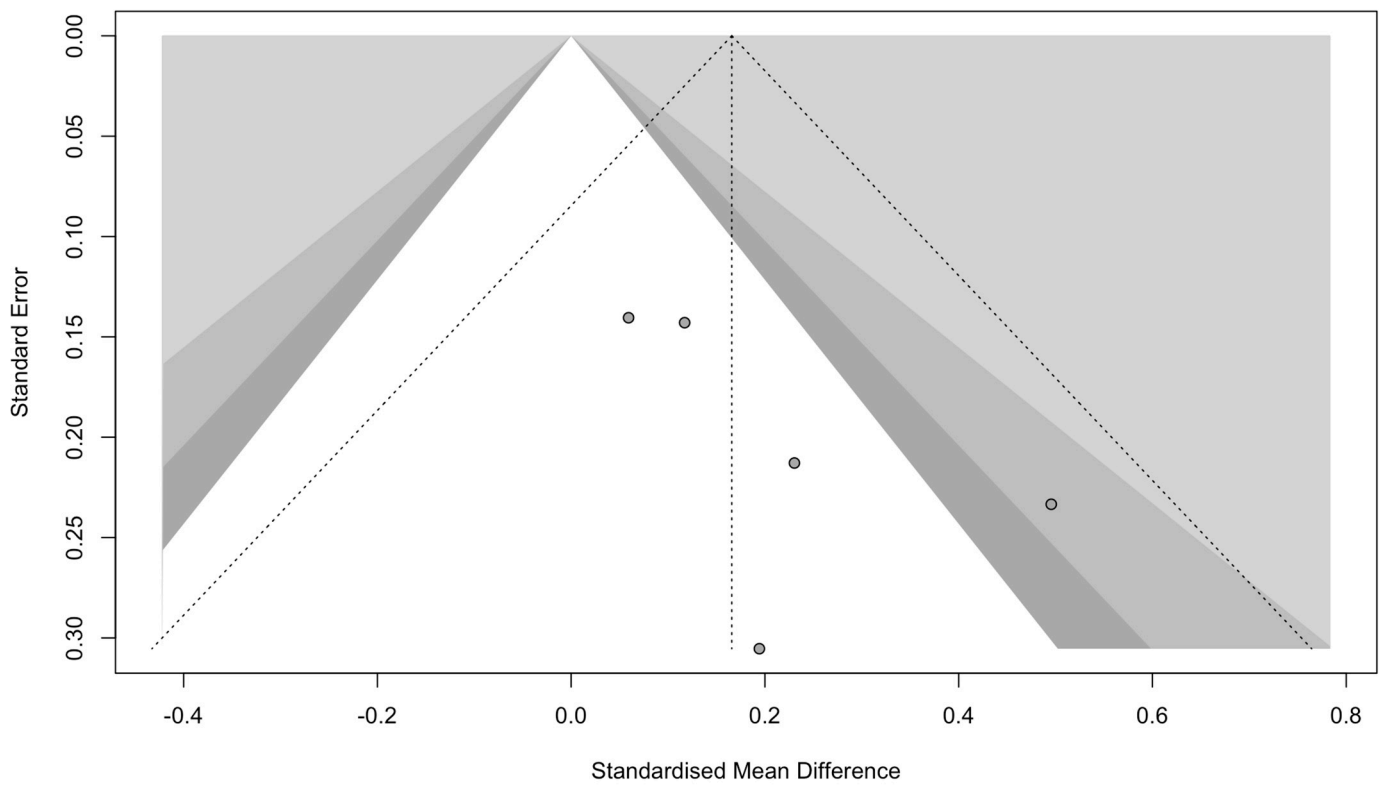**Figure S4:** Trim-and-fill plot of baseline anxiety symptoms.
